# Supplementary material for: Effects of plant growth-promoting rhizobacteria on blueberry growth and rhizosphere soil microenvironment
Source: PeerJ journal article supplement (doi:10.7717/peerj.16992), 2024-02-26
Supplement: raw_data_20230921.zip [file raw_data_20230921.zip]

## Sheet: different analysis
OCC
分组		N	子集
			1	2	3	4	5	6	7
Duncana,b,c	CK	3	433
	P7	3		465
	P21	3			510.667
	P22	3			529.333	529.333
	P5	3				534
	P26	3				541.333	541.333
	P42	3					557	557
	P6	3						569.667	569.667
	P24	3							580.333
	P40	3							584.667
	Sig.		1	1	0.0807679	0.276756	0.138341	0.226415	0.176741
已显示同类子集中的组均值。 基于观测到的均值。 误差项为均值方 (错误) = 154.500。
a. 使用调和均值样本大小 = 3.000。
b. 组大小不相等。 将使用组大小的调和均值。 不保证 I 型误差级别。
c. Alpha = .05。
TNC
分组		N	子集
			1	2	3	4
Duncana,b,c	CK	3	21.3317
	P7	3	22.5593	22.5593
	P21	3		25.0313	25.0313
	P22	3		25.598	25.598
	P5	3			26.784	26.784
	P26	3			26.996	26.996
	P42	3			27.341	27.341
	P6	3			28.1887	28.1887
	P24	3			28.5023	28.5023
	P40	3				29.1753
	Sig.		0.418329	0.0657951	0.0522669	0.168252
已显示同类子集中的组均值。 基于观测到的均值。 误差项为均值方 (错误) = 3.310。
a. 使用调和均值样本大小 = 3.000。
b. 组大小不相等。 将使用组大小的调和均值。 不保证 I 型误差级别。
c. Alpha = .05。
HNC
分组		N	子集
			1	2	3	4	5
Duncana,b,c	CK	3	0.573333
	P40	3	0.585333	0.585333
	P42	3	0.619333	0.619333
	P26	3	0.638	0.638
	P24	3		0.685
	P5	3			0.78
	P21	3			0.86	0.86
	P7	3				0.923333
	P22	3				0.94
	P6	3					1.05667
	Sig.		0.196798	0.0512658	0.0870094	0.102888	1
已显示同类子集中的组均值。 基于观测到的均值。 误差项为均值方 (错误) = .003。
a. 使用调和均值样本大小 = 3.000。
b. 组大小不相等。 将使用组大小的调和均值。 不保证 I 型误差级别。
c. Alpha = .05。
TPHC
分组		N	子集
			1	2	3	4
Duncana,b,c	CK	3	226
	P26	3	255	255
	P24	3	260	260
	P6	3		300	300
	P42	3			320
	P40	3			325
	P5	3			330
	P21	3			345
	P7	3			350
	P22	3				445
	Sig.		0.174872	0.0764042	0.0656929	1
已显示同类子集中的组均值。 基于观测到的均值。 误差项为均值方 (错误) = 786.700。
a. 使用调和均值样本大小 = 3.000。
b. 组大小不相等。 将使用组大小的调和均值。 不保证 I 型误差级别。
c. Alpha = .05。
APHC
分组		N	子集
			1	2	3
Duncana,b,c	P24	3	33.7
	P21	3	36.5333	36.5333
	P5	3	37.0667	37.0667
	P26	3	37.2833	37.2833
	P42	3	37.3	37.3
	P6	3	37.35	37.35
	P40	3	38.25	38.25
	P7	3	38.75	38.75	38.75
	CK	3		40.8	40.8
	P22	3			43.5
	Sig.		0.0608698	0.109359	0.055575
已显示同类子集中的组均值。 基于观测到的均值。 误差项为均值方 (错误) = 7.428。
a. 使用调和均值样本大小 = 3.000。
b. 组大小不相等。 将使用组大小的调和均值。 不保证 I 型误差级别。
c. Alpha = .05。
TPOC
分组		N	子集
			1	2	3	4	5	6
Duncana,b,c	CK	3	1.19333
	P26	3	1.32	1.32
	P6	3	1.42	1.42
	P24	3		1.55333
	P7	3			1.89
	P40	3			1.995
	P5	3				2.42333
	P42	3				2.54833
	P22	3					3.11
	P21	3						4.56
	Sig.		0.127757	0.117421	0.446955	0.366729	1	1
已显示同类子集中的组均值。 基于观测到的均值。 误差项为均值方 (错误) = .027。
a. 使用调和均值样本大小 = 3.000。
b. 组大小不相等。 将使用组大小的调和均值。 不保证 I 型误差级别。
c. Alpha = .05。
APOC
分组		N	子集
			1	2	3	4
Duncana,b,c	P7	3	0.224
	CK	3	0.23
	P42	3	0.28	0.28
	P40	3	0.2965	0.2965
	P6	3		0.333	0.333
	P21	3		0.337533	0.337533
	P22	3		0.351	0.351
	P26	3			0.4085	0.4085
	P5	3				0.4545
	P24	3				0.4695
	Sig.		0.0748529	0.0866419	0.0642257	0.119521
已显示同类子集中的组均值。 基于观测到的均值。 误差项为均值方 (错误) = .002。
a. 使用调和均值样本大小 = 3.000。
b. 组大小不相等。 将使用组大小的调和均值。 不保证 I 型误差级别。
c. Alpha = .05。
Branchnumber
分组		N	子集
			1	2	3	4	5	6	7
Duncana,b,c	CK	3	2.58
	P26	3		3
	P6	3			3.20667
	P22	3				3.46
	P5	3				3.52223	3.52223
	P7	3				3.55	3.55
	P40	3					3.64
	P21	3						3.8622
	P24	3						3.903
	P42	3							4.4
	Sig.		1	1	1	0.212948	0.106843	0.544794	1
已显示同类子集中的组均值。 基于观测到的均值。 误差项为均值方 (错误) = .007。
a. 使用调和均值样本大小 = 3.000。
b. 组大小不相等。 将使用组大小的调和均值。 不保证 I 型误差级别。
c. Alpha = .05。
rootlength
分组		N	子集
			1	2	3	4	5	6	7	8
Duncana,b,c	P26	3	8.38
	CK	3		9.48167
	P5	3			9.69
	P40	3			9.8
	P24	3			9.86
	P21	3				10.25
	P7	3					10.44
	P42	3						11.03
	P6	3							11.92
	P22	3								13.3
	Sig.		1	1	0.0720859	1	1	1	1	1
已显示同类子集中的组均值。 基于观测到的均值。 误差项为均值方 (错误) = .011。
a. 使用调和均值样本大小 = 3.000。
b. 组大小不相等。 将使用组大小的调和均值。 不保证 I 型误差级别。
c. Alpha = .05。
plantheight
	分组	N	子集
			1	2	3	4	5	6	7
Duncana,b,c	CK	3	12.9267
	P5	3		13.7633
	P7	3			14.1467
	P26	3			14.16
	P6	3				15.07
	P24	3					15.73
	P40	3						16.14
	P42	3						16.2
	P22	3						16.38
	P21	3							16.84
	Sig.		1	1	0.908	1	1	0.06	1
已显示同类子集中的组均值。
基于观测到的均值。
误差项为均值方 (错误) = .020。
a 使用调和均值样本大小 = 3.000。
b 组大小不相等。 将使用组大小的调和均值。 不保证 I 型误差级别。
c Alpha = .05。
chl
分组		N	子集
			1	2	3	4	5	6
Duncana,b,c	P24	3	0.735667
	P26	3	0.845
	CK	3		0.981333
	P7	3		1.029
	P5	3		1.05	1.05
	P40	3			1.18	1.18
	P21	3				1.22
	P6	3					1.53133
	P42	3					1.56
	P22	3						1.73
	Sig.		0.107547	0.329249	0.0588716	0.544563	0.663391	1
已显示同类子集中的组均值。 基于观测到的均值。 误差项为均值方 (错误) = .006。
a. 使用调和均值样本大小 = 3.000。
b. 组大小不相等。 将使用组大小的调和均值。 不保证 I 型误差级别。
c. Alpha = .05。
leafnumber
分组		N	子集
			1	2	3	4	5	6
Duncana,b,c	P7	3	24.6667
	CK	3		27
	P26	3		27.2
	P21	3			28.5
	P24	3			28.5
	P6	3			28.5
	P5	3				30.94
	P22	3				31.3
	P42	3					35.07
	P40	3						40.1
	Sig.		1	0.438712	1	0.17036	1	1
已显示同类子集中的组均值。 基于观测到的均值。 误差项为均值方 (错误) = .096。
a. 使用调和均值样本大小 = 3.000。
b. 组大小不相等。 将使用组大小的调和均值。 不保证 I 型误差级别。
c. Alpha = .05。

## Sheet: principal component analysis
解释的总方差								成份矩阵a
成份	初始特征值			提取平方和载入					成份
	合计	方差的 %	累积 %	合计	方差的 %	累积 %			1	2	3	4	5
1	8.22164	37.3711	37.3711	8.22164	37.3711	37.3711		Zscore(OCC)	0.426981	0.420179	0.635147	0.308697	-0.262926
2	4.40518	20.0235	57.3946	4.40518	20.0235	57.3946		Zscore(TNC)	0.361071	0.359478	0.630034	0.319042	-0.214606
3	3.16726	14.3966	71.7913	3.16726	14.3966	71.7913		Zscore(HNC)	0.249321	0.343732	-0.508976	-0.377274	-0.601788
4	1.7781	8.08226	79.8735	1.7781	8.08226	79.8735		Zscore(TPHC)	0.420716	0.615982	-0.51395	0.0534497	0.10358
5	1.56426	7.11026	86.9838	1.56426	7.11026	86.9838		Zscore(APHC)	-0.00627212	0.0151938	-0.693773	0.446306	0.123484
6	0.939097	4.26862	91.2524					Zscore(TPOC)	0.110298	0.742961	-0.248852	-0.292674	0.480385
7	0.666946	3.03157	94.284					Zscore(APOC)	-0.336406	0.553258	0.536677	0.0237496	-0.355495
8	0.366359	1.66527	95.9493					Zscore(Branchnumber)	0.563261	0.477844	0.31866	-0.178203	0.323183
9	0.293329	1.33331	97.2826					Zscore(rootlength)	0.441006	0.450019	-0.607806	0.258625	-0.258886
10	0.242233	1.10106	98.3836					Zscore(plantheight)	0.463992	0.672913	0.0916943	0.189158	0.231181
11	0.182441	0.829276	99.2129					Zscore(chl)	0.561315	0.387671	-0.544077	0.293263	-0.00263256
12	0.0942147	0.428249	99.6412					Zscore(leafnumber)	0.53835	0.191656	0.330572	0.482685	0.42118
13	0.0297252	0.135115	99.7763					Zscore(Phosphorus)	0.927065	-0.288981	0.0871947	-0.00297647	-0.0485181
14	0.0176636	0.080289	99.8566					Zscore(auxin)	0.794232	-0.26275	0.160359	-0.103146	0.282881
15	0.0145998	0.0663628	99.9229					Zscore(Acidobacteriota)	0.947284	-0.233323	0.0497287	0.0267669	-0.088391
16	0.00992506	0.0451139	99.968					Zscore(Actinomycetota)	0.129419	0.411869	0.0828463	-0.707159	0.259834
17	0.00325244	0.0147838	99.9828					Zscore(Bacteroidota)	0.888116	-0.235684	0.0876924	-0.281115	-0.0174889
18	0.0015444	0.00702	99.9898					Zscore(Pseudomonadota)	-0.364559	0.884104	0.0942419	-0.191733	-0.157992
19	0.00119117	0.0054144	99.9953					Zscore(Verrucomicrobiota)	-0.84175	-0.253175	0.083927	-0.0104367	0.196022
20	0.000751866	0.00341757	99.9987					Zscore(Ascomycota)	0.906197	-0.184121	0.00885634	-0.211163	-0.239721
21	0.000188897	0.000858624	99.9995					Zscore(Basidiomycota)	-0.944318	0.127438	-0.126838	0.158225	0.127212
22	0.000102956	0.000467981	100					Zscore(Mucoromycota)	-0.681918	0.58717	0.212896	-0.00633762	-0.0802508
提取方法：主成份分析。								提取方法 :主成份。
								a. 已提取了 5 个成份。
